# Supplementary material
Source: PubMed Central journal article supplement (PMC5045894)
Supplement: NIHMS815937-supplement-Figure_E1.pdf [file NIHMS815937-supplement-Figure_E1.pdf]

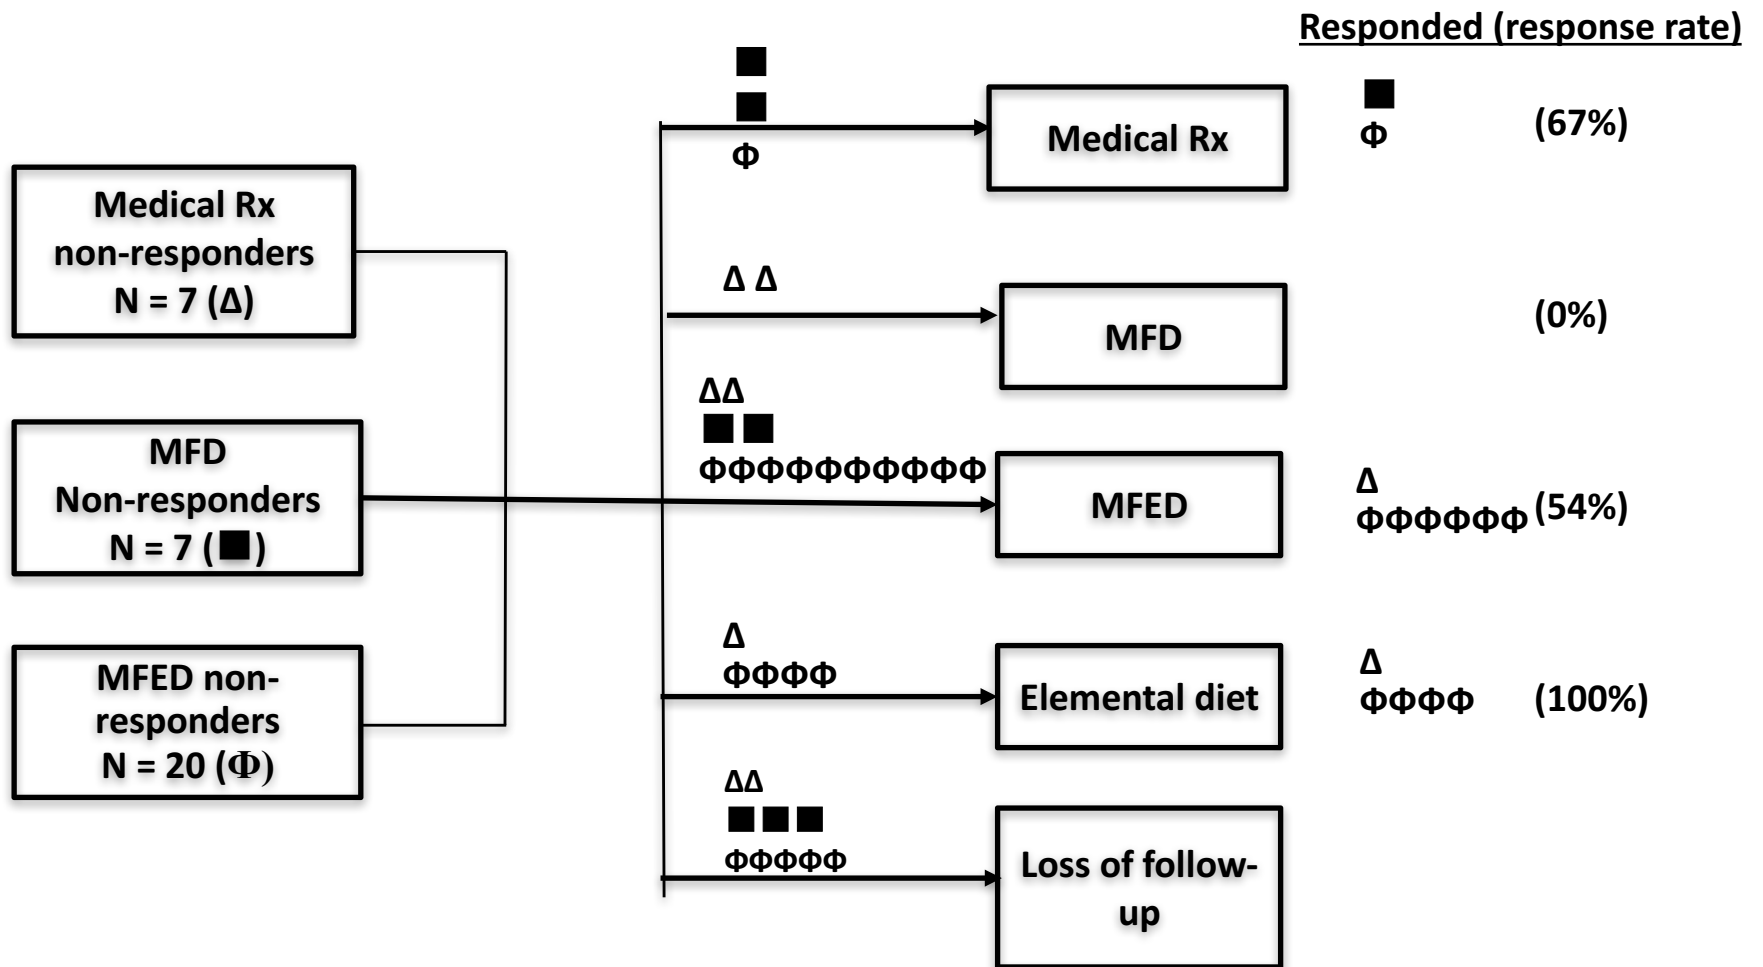

Supplemental figure 1. Clinical outcome of the 34 patients who failed initial treatment of EoE. MFED = multiple food elimination diet; MFE = milk-free diet
